# Supplementary material for: Assessment of hyperprogression versus the natural course of disease development with nivolumab with or without ipilimumab versus placebo in phase III, randomized, controlled trials
Source: PubMed Central journal article supplement — J Immunother Cancer. 2022 Apr 5;10(4):e004273. doi: 10.1136/jitc-2021-004273 (PMC8983994; doi:10.1136/jitc-2021-004273), 2022-04-05

---

**Assessment of hyperprogression versus the natural course of disease development with nivolumab with or without ipilimumab versus placebo in phase III, randomized, controlled trials**

**Online Supplemental Tables and Figures**

Y.-K. Kang<sup>1\*</sup>, M. Reck<sup>2\*</sup>, P. Nghiem<sup>3</sup>, Y. Feng<sup>4†</sup>, G. Plautz<sup>4</sup>, H. R. Kim<sup>5</sup>, T. Owonikoko<sup>6</sup>, N. Boku<sup>7‡,8</sup>, L.-T. Chen<sup>9</sup>, M. Lei<sup>4</sup>, H. Chang<sup>4</sup>, W. H. Lin<sup>4†</sup>, A. Roy<sup>4</sup>, A. Bello<sup>4</sup>, J. Sheng<sup>4</sup>

\*Co-lead authors

†Employed by Bristol Myers Squibb at the time of the analysis

‡At the time of the analysis

<sup>1</sup>Department of Oncology, University of Ulsan College of Medicine, Asan Medical Center, Seoul, Republic of Korea; <sup>2</sup>Thoracic Oncology, LungenClinic, Airway Research Center North (ARCN), German Center of Lung Research (DZL), Grosshansdorf, Germany; <sup>3</sup>Department of Medicine, Division of Dermatology, University of Washington & Fred Hutchinson Cancer Research Center, Seattle, USA; <sup>4</sup>Bristol Myers Squibb, Princeton, USA; <sup>5</sup>Division of Medical Oncology, Yonsei Cancer Center, Yonsei University College of Medicine, Seoul, Republic of Korea; <sup>6</sup>Department of Hematology and Medical Oncology, Winship Cancer Institute of Emory University, Atlanta, USA; <sup>7</sup>Department of Gastrointestinal Medical Oncology, National Cancer Center Hospital (NCCH), Tokyo, Japan; <sup>8</sup>Department of Medical Oncology and General Medicine, IMSUT Hospital, Institute of Medical Science, University of Tokyo, Tokyo, Japan; <sup>9</sup>National Institute of Cancer Research, National Health Research Institutes, Tainan, Taiwan, and Kaohsiung Medical University Hospital, Kaohsiung Medical University, Kaohsiung, Taiwan

---

**Online Supplemental Table S1. Patient demographics and baseline characteristics for patients excluded from the ATTRACTION-2 HPD analysis population**

| Characteristic                         | Placebo<br>(n = 48) | Nivolumab 3 mg/kg<br>(n = 87) |
|----------------------------------------|---------------------|-------------------------------|
| <b>Age, years, median (range)</b>      | 60 (28–79)          | 56 (24–79)                    |
| <b>Female, n (%)</b>                   | 16 (33)             | 41 (47)                       |
| <b>Race, n (%)</b>                     |                     |                               |
| Asian                                  | 48 (100)            | 87 (100)                      |
| Native Hawaiian/other Pacific Islander | 0                   | 0                             |
| <b>ECOG PS, n (%)</b>                  |                     |                               |
| 0                                      | 10 (21)             | 21 (24)                       |
| 1                                      | 38 (79)             | 66 (76)                       |
| <b>Baseline tumor size, cm</b>         |                     |                               |
| n                                      | 16                  | 25                            |
| Mean (SD)                              | 6.93 (5.39)         | 8.12 (4.94)                   |
| Median (range)                         | 4 (1.2–17.9)        | 9.5 (1.4–16.2)                |

ECOG PS, Eastern Cooperative Oncology Group performance status;  
HPD, hyperprogressive disease; SD, standard deviation.

**Online Supplemental Table S2. Demographics and baseline characteristics of nivolumab-treated patients with target lesion SLD increases  $\geq 200\%$  in the ATTRACTION-2 study.**

| <b>Characteristic</b>                                     | <b>Patient 1</b>           | <b>Patient 2</b> | <b>Patient 3</b>          |
|-----------------------------------------------------------|----------------------------|------------------|---------------------------|
| <b>Age, years</b>                                         | 67                         | 55               | 59                        |
| <b>Sex</b>                                                | F                          | M                | M                         |
| <b>ECOG PS</b>                                            | 1                          | 1                | 1                         |
| <b>Disease stage</b>                                      | IIIC                       | IV               | IIIC                      |
| <b>Macroscopic tumor type (Borrmann's classification)</b> | Advanced carcinoma type II | Unknown          | Advanced carcinoma type I |
| <b>Histological type (Lauren classification)</b>          | Other                      | Unknown          | Unknown                   |
| <b>Number of organs with metastases</b>                   | 1                          | 3                | 1                         |
| <b>Smoking status</b>                                     | Never                      | Never            | Former                    |
| <b>Alcohol consumption status</b>                         | Never                      | Never            | Former                    |
| <b>Baseline target lesion SLD, cm</b>                     | 2.2                        | 5.4              | 2.2                       |

ECOG PS, Eastern Cooperative Oncology Group performance status; F, female; M, male; SLD, sum of the longest diameters.

---

**Online Supplemental Table S3. *MDM2* CNAs and % TGR at the first on-treatment scan in 4 of 91 patients with genomic data in the ATTRACTION-2 nivolumab 3 mg/kg study arm**

| <b>Patient identifier*</b> | <b><i>MDM2</i> CNA</b>                | <b>% TGR at the first scan</b> | <b>BOR</b> | <b>OS, months/censoring</b> |
|----------------------------|---------------------------------------|--------------------------------|------------|-----------------------------|
| 1                          | Amplification<br>(8, exons 11 of 11)  | -16.2                          | PR         | 8.9; 1                      |
| 2                          | Amplification<br>(15, exons 11 of 11) | -3.4                           | SD         | 14.0; 1                     |
| 3                          | Amplification<br>(13, exons 11 of 11) | 58.1                           | PD         | 3.5; 0                      |
| 4                          | Amplification<br>(61, exons 11 of 11) | Not available                  | NE         | 1.2; 0                      |

BOR, best overall response; CNA, copy number alteration; NE, not evaluable; OS, overall survival; PD, progressive disease; PR, partial response; SD, stable disease; TGR, tumor growth rate.

\*Arbitrary patient identifier numbers.

**Online Supplemental Table S4. EGFR alterations and % TGR at the first on-treatment scan in 6 of 91 patients with genomic data in the ATTRACTION-2 nivolumab 3 mg/kg study arm**

| <b>Patient identifier*</b> | <b>EGFR alteration</b>                                  | <b>% TGR at the first scan</b> | <b>BOR</b> | <b>OS, months/censoring</b> |
|----------------------------|---------------------------------------------------------|--------------------------------|------------|-----------------------------|
| 1                          | Amplification (8, exons 30 of 30)                       | -31                            | PR         | 12.5; 1                     |
| 2                          | Amplification (81, exons 30 of 30), EGFR rearrangement  | 3                              | SD         | 8.3; 0                      |
| 3                          | Amplification (7, exons 30 of 30)                       | 5                              | PD         | 2.5; 0                      |
| 4                          | Amplification (125, exons 30 of 30), EGFR rearrangement | 24                             | PD         | 3.7; 0                      |
| 5                          | Amplification (9, exons 28 of 30), EGFR rearrangement   | 29                             | PD         | 2.4; 0                      |
| 6                          | Amplification (122, exons 30 of 30)                     | 92                             | NE         | 0.9; 0                      |

BOR, best overall response; NE, not evaluable; OS, overall survival; PD, progressive disease; PR, partial response; SD, stable disease; TGR, tumor growth rate.

\*Arbitrary patient identifier numbers.

**Online Supplemental Table S5. Patient demographics and baseline characteristics for patients excluded from the CheckMate 451 HPD analysis population**

| <b>Characteristic</b>                                             | <b>Placebo<br/>(n = 100)</b> | <b>Nivolumab 240 mg<br/>(n = 103)</b> | <b>Nivolumab 1 mg/kg +<br/>ipilimumab 3 mg/kg<br/>(n = 100)</b> |
|-------------------------------------------------------------------|------------------------------|---------------------------------------|-----------------------------------------------------------------|
| <b>Age, years, median<br/>(range)</b>                             | 63 (44–84)                   | 65 (32–84)                            | 65 (47–80)                                                      |
| <b>Female, n (%)</b>                                              | 40 (40)                      | 41 (40)                               | 39 (39)                                                         |
| <b>Race, n (%)</b>                                                |                              |                                       |                                                                 |
| White                                                             | 71 (71)                      | 75 (73)                               | 75 (75)                                                         |
| Black or African<br>American                                      | 1 (1)                        | 4 (4)                                 | 0                                                               |
| Asian                                                             | 27 (27)                      | 23 (22)                               | 24 (24)                                                         |
| Other                                                             | 1 (1)                        | 1 (1)                                 |                                                                 |
| Not reported                                                      | 0                            | 0                                     | 1 (1)                                                           |
| <b>ECOG PS, n (%)</b>                                             |                              |                                       |                                                                 |
| 0                                                                 | 42 (42)                      | 41 (40)                               | 33 (33)                                                         |
| 1                                                                 | 58 (58)                      | 62 (60)                               | 67 (67)                                                         |
| <b>Region, n (%)</b>                                              |                              |                                       |                                                                 |
| US/Canada                                                         | 22 (22)                      | 21 (20)                               | 26 (26)                                                         |
| Asia                                                              | 27 (27)                      | 21 (20)                               | 24 (24)                                                         |
| Europe                                                            | 35 (35)                      | 42 (41)                               | 39 (39)                                                         |
| Rest of world                                                     | 16 (16)                      | 19 (18)                               | 11 (11)                                                         |
| <b>Type of first-line,<br/>platinum-based<br/>therapy, n (%)*</b> |                              |                                       |                                                                 |
| Carboplatin                                                       | 57 (57)                      | 66 (64)                               | 68 (68)                                                         |
| Cisplatin                                                         | 46 (46)                      | 43 (42)                               | 34 (34)                                                         |
| <b>Baseline tumor size,<br/>cm</b>                                |                              |                                       |                                                                 |
| n                                                                 | 18                           | 19                                    | 21                                                              |
| Mean (SD)                                                         | 7.10 (5.69)                  | 6.66 (4.86)                           | 5.42 (4.34)                                                     |
| Median (minimum,<br>maximum)                                      | 4.8 (1.5–19.4)               | 4.8 (1.1–18.1)                        | 3.9 (1.4–20.4)                                                  |

ECOG PS, Eastern Cooperative Oncology Group performance status; HPD, hyperprogressive disease; SD, standard deviation.

\*Patients may have received more than one type of platinum compound.

**Online Supplemental Figure S1. Distribution of timing of first post-treatment scan in patients randomized to (A) placebo and (B) nivolumab 240 mg Q2W in the ATTRACTION-2 study. The light gray shaded area indicates the protocol-defined window for first post-treatment scan at week 6 (range, 5–7 weeks). Q2W, every 2 weeks.**

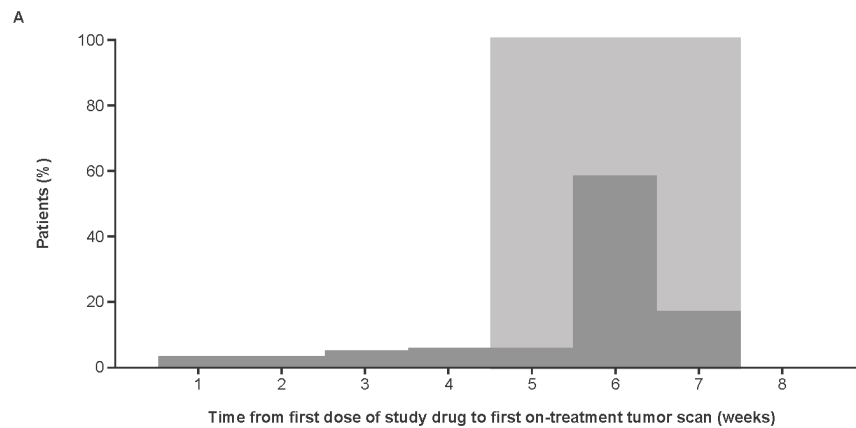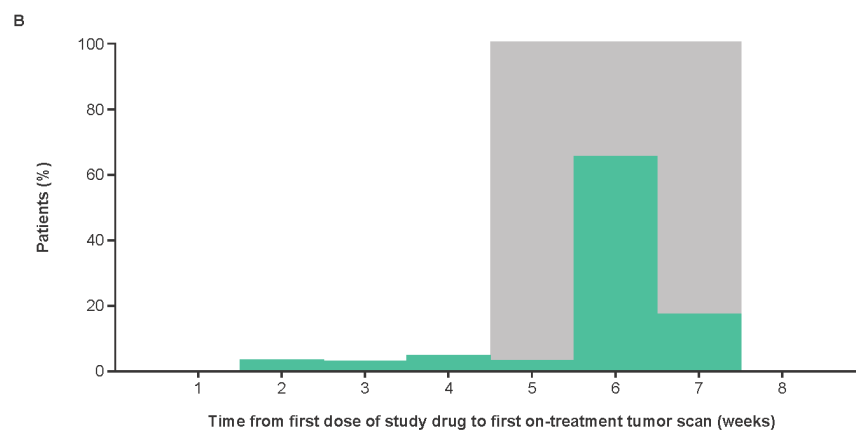

**Online Supplemental Figure S2. Proportions of patients with  $\geq 20\%$ ,  $\geq 50\%$ , and  $\geq 100\%$  increases from baseline in target lesion SLD at the first on-treatment scan in patients with a best response of SD or PD at the first assessment in ATTRACTION-2.**

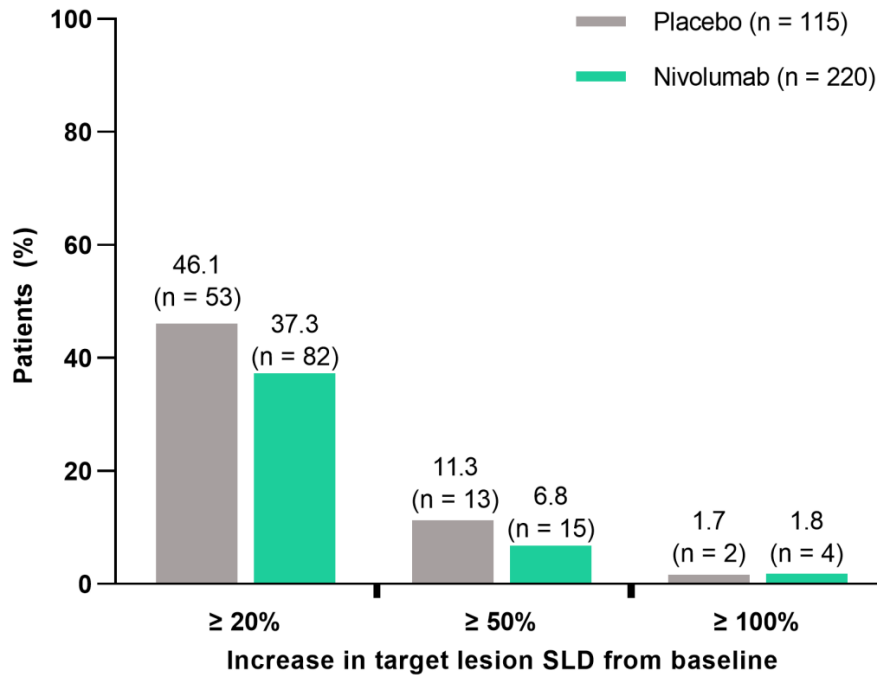

PD, progressive disease; SD, stable disease; SLD, sum of the longest diameters.



**Online Supplemental Figure S3. Proportions of patients with  $\geq 20\%$ ,  $\geq 50\%$ , and  $\geq 100\%$  increases from baseline in target lesion SLD at the first on-treatment scan in ATTRACTION-2 by timing of first on-treatment scan relative to the start of treatment. SLD, sum of the longest diameters.**

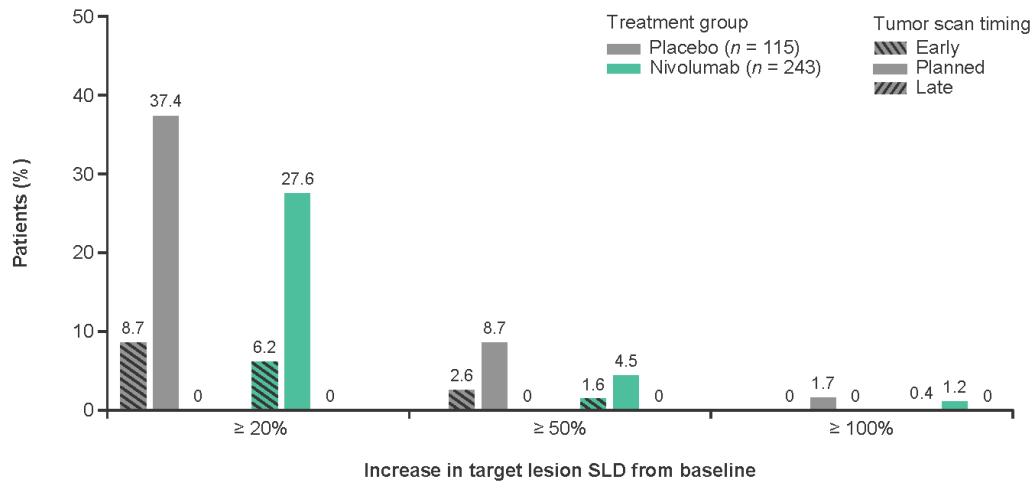

**Online Supplemental Figure S4. Distribution of timing of first post-treatment scan in patients randomized to (A) placebo, (B) nivolumab 240 mg Q2W, and (C) nivolumab 1 mg/kg plus ipilimumab 3 mg/kg Q2W in CheckMate 451. The light gray shaded area indicates the protocol-defined window for the first post-treatment scan at week 6 (range, 5–7 weeks). Q2W, every 2 weeks.**

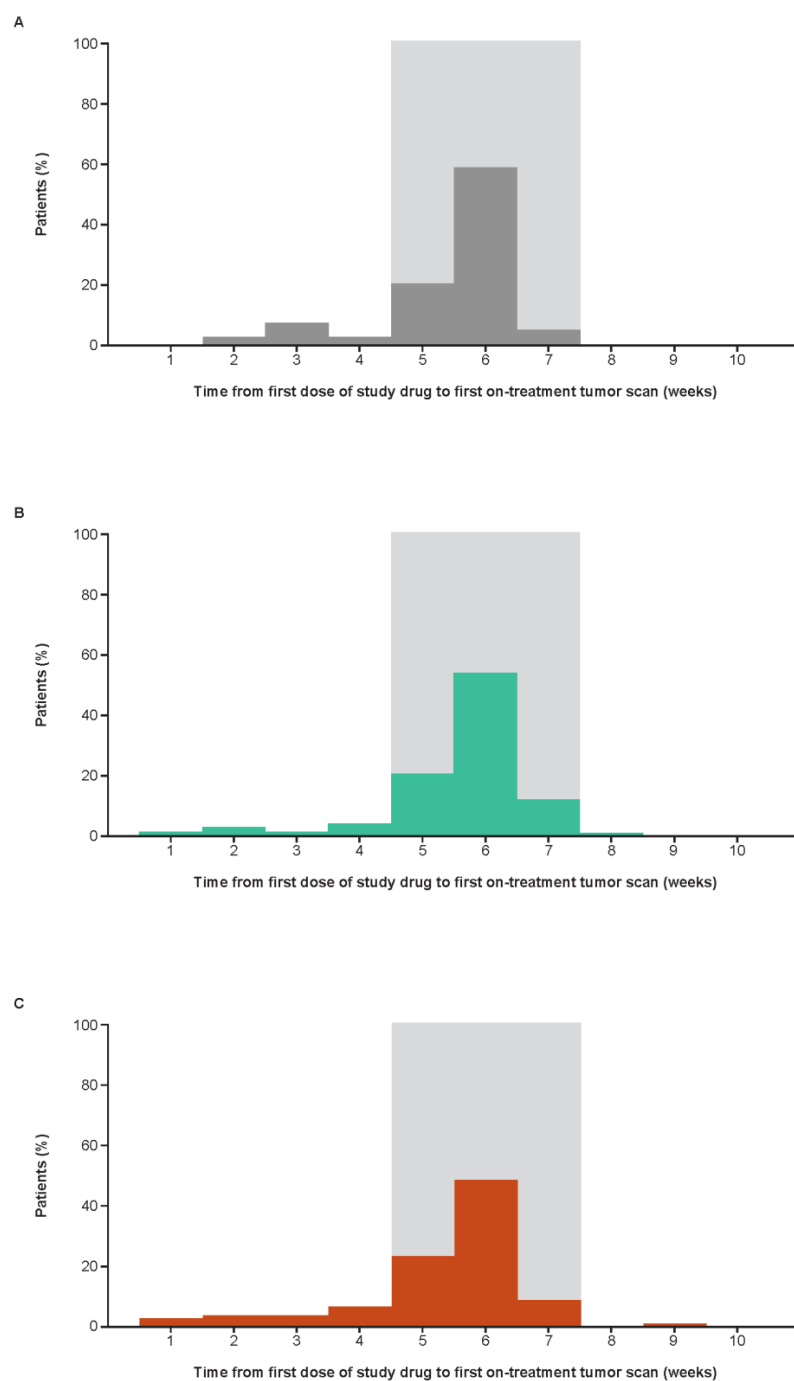

**Online Supplemental Figure S5. Proportions of patients with  $\geq 20\%$ ,  $\geq 50\%$ , and  $\geq 100\%$  increases from baseline in target lesion SLD at the first on-treatment scan in patients with a best response of SD or PD at the first assessment in CheckMate 451.**

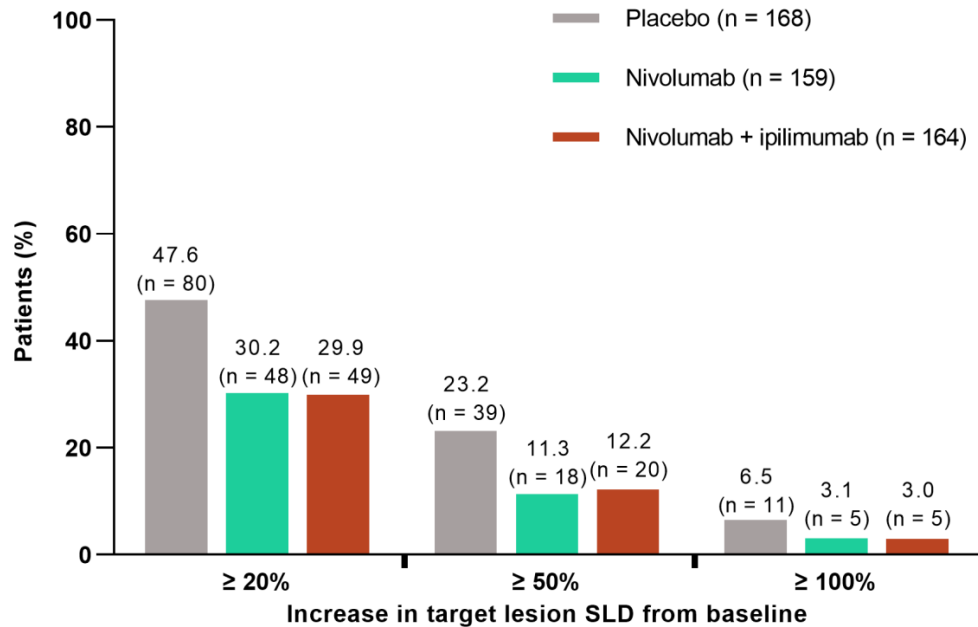

PD, progressive disease; SD, stable disease; SLD, sum of the longest diameters.

**Online Supplemental Figure S6. Proportions of patients with  $\geq 20\%$ ,  $\geq 50\%$ , and  $\geq 100\%$  increases from baseline in target lesion SLD at the first on-treatment scan in CheckMate 451 by timing of first on-treatment scan relative to the start of treatment. SLD, sum of the longest diameters.**

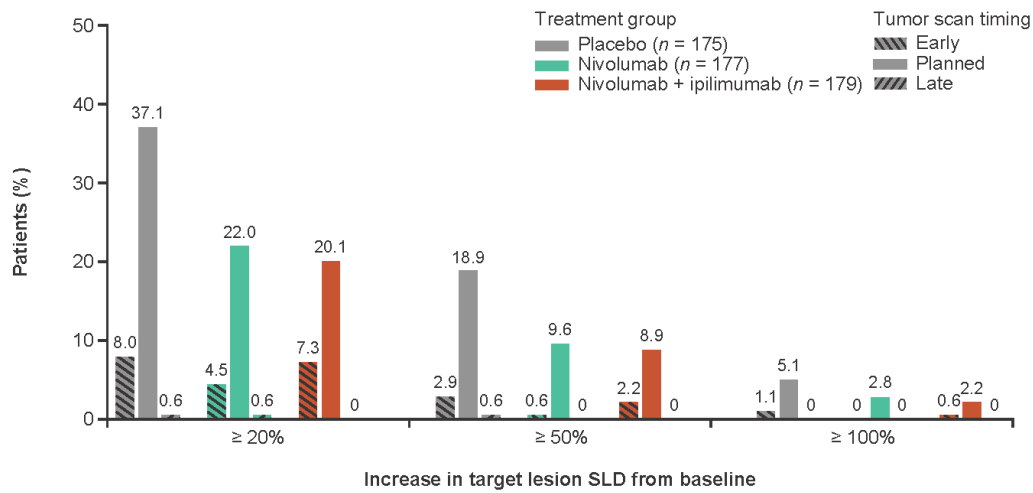

Supplement: jitc-2021-004273supp001.pdf [file jitc-2021-004273supp001.pdf]
